# Supplementary material for: A high Mn(II)-tolerance strain, Bacillus thuringiensis HM7, isolated from manganese ore and its biosorption characteristics
Source: PeerJ journal article supplement (doi:10.7717/peerj.8589), 2020-02-19

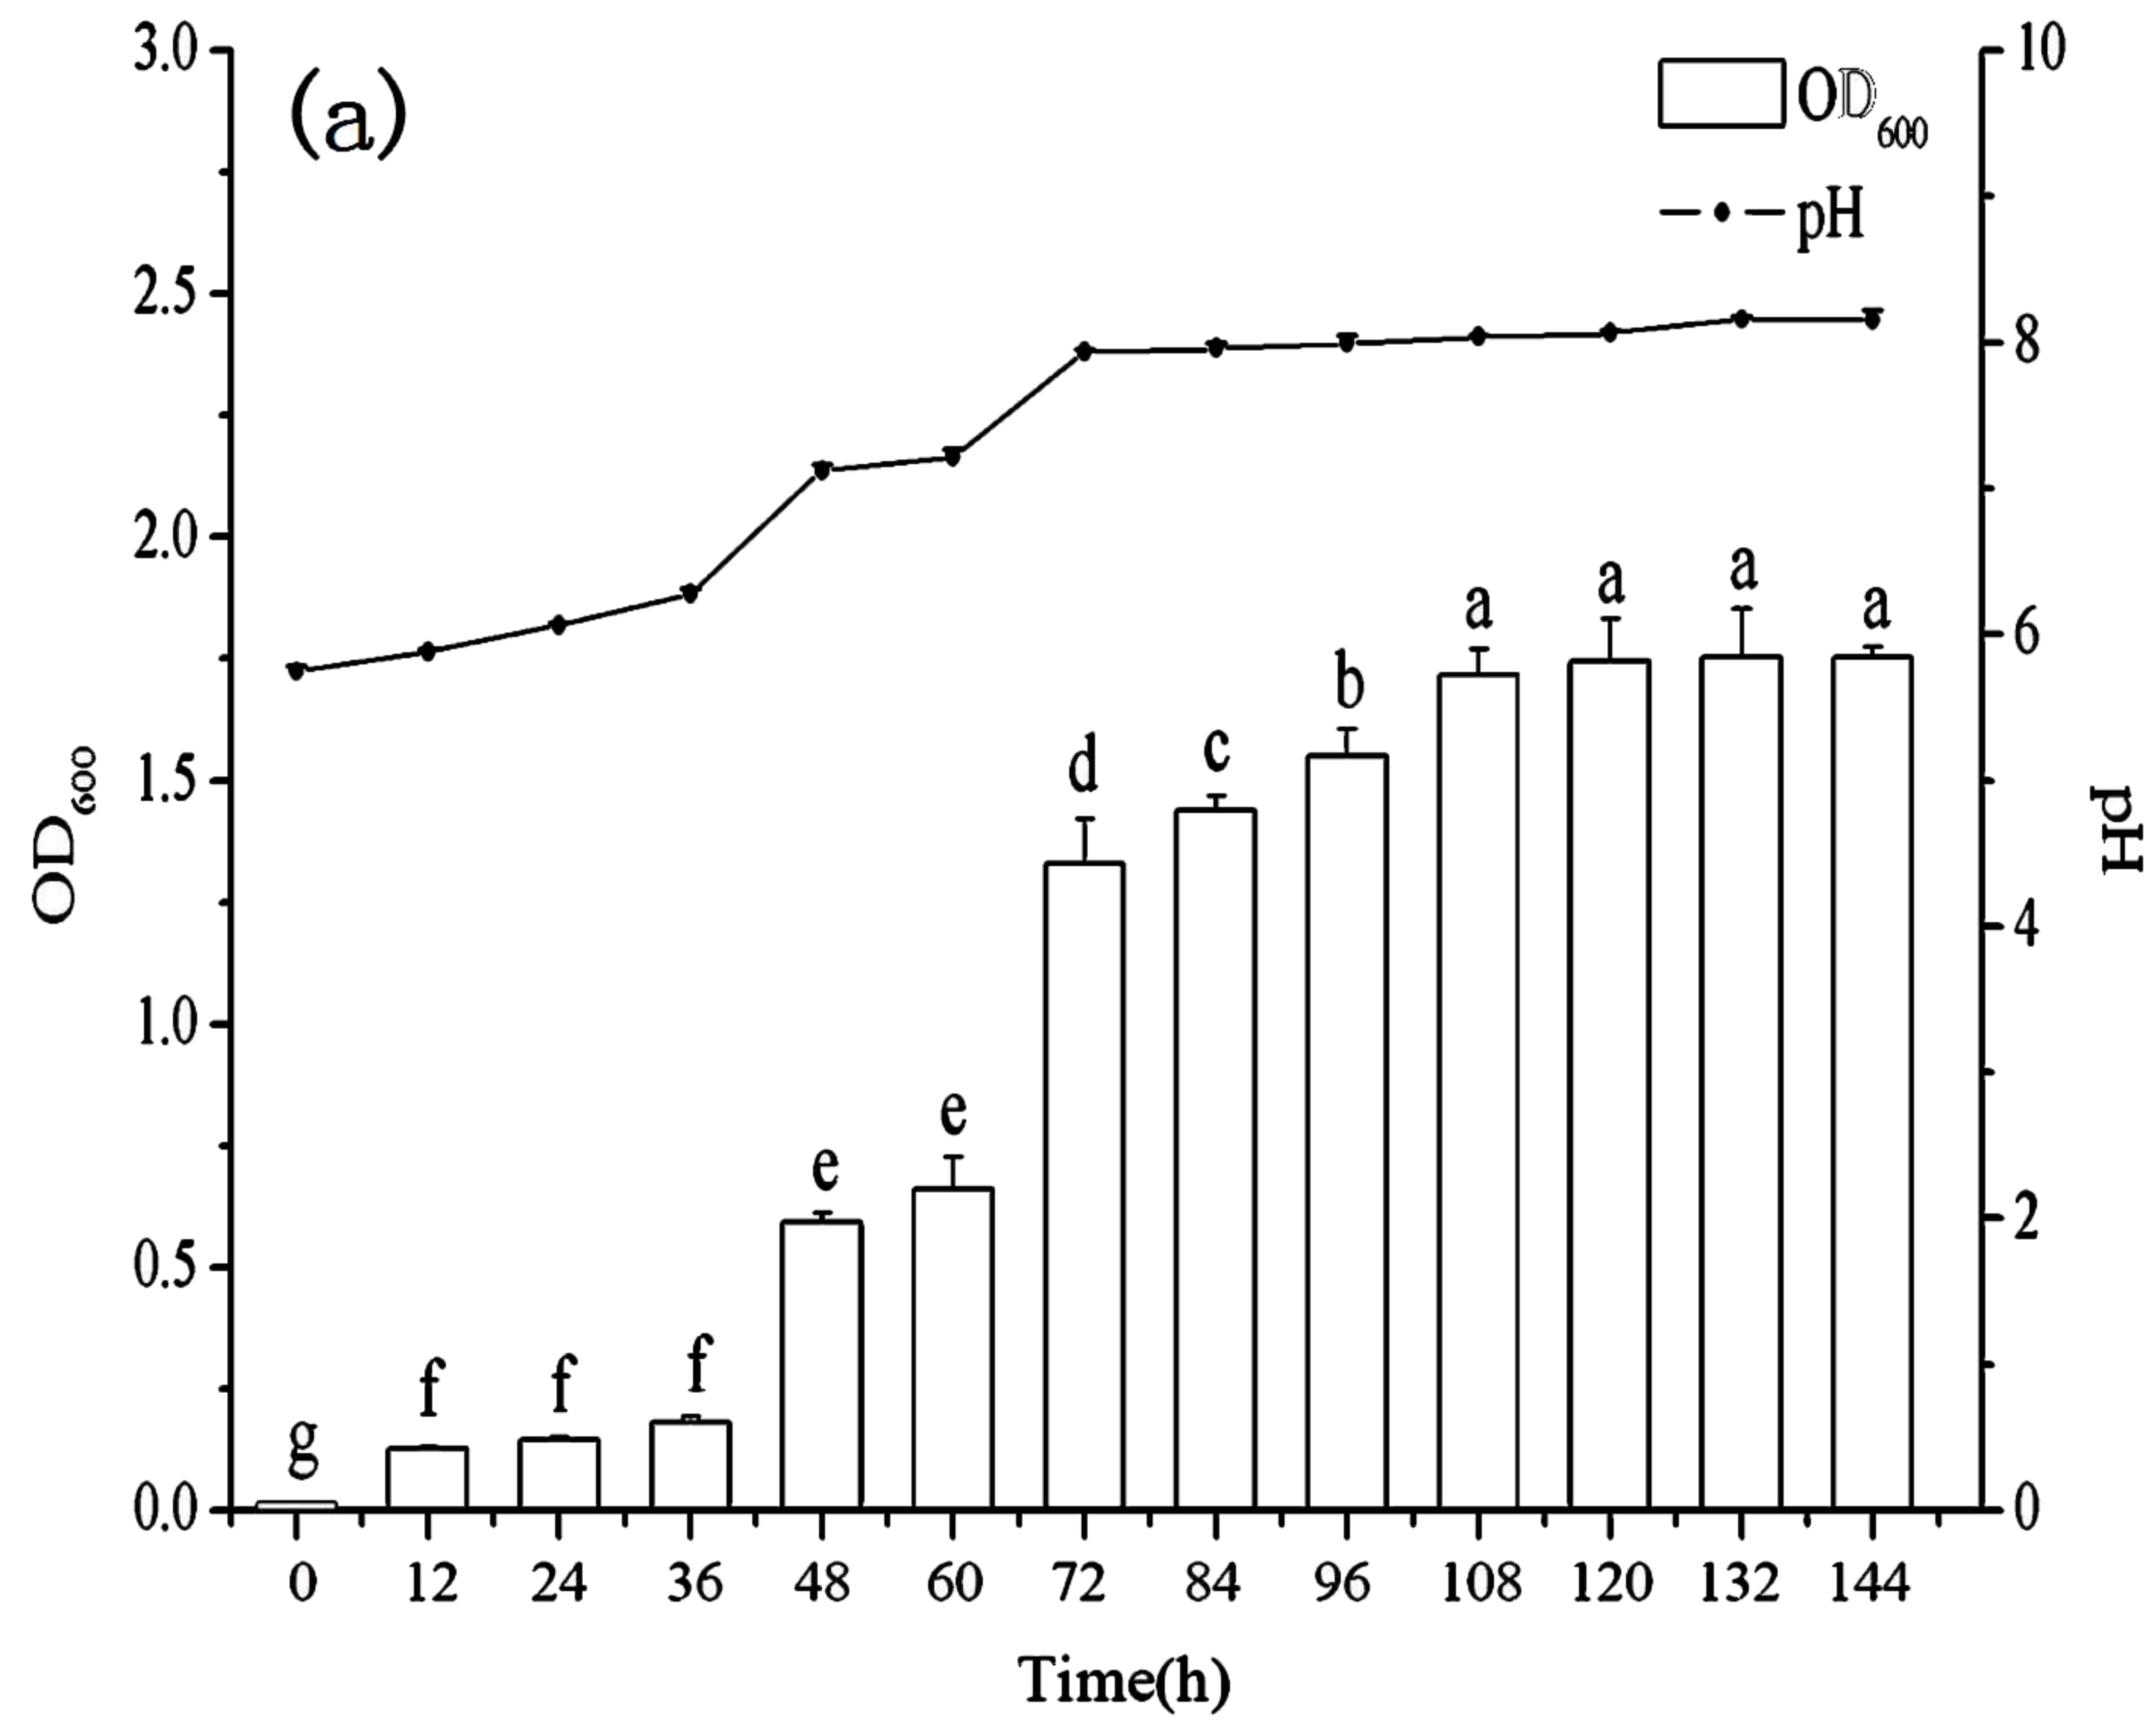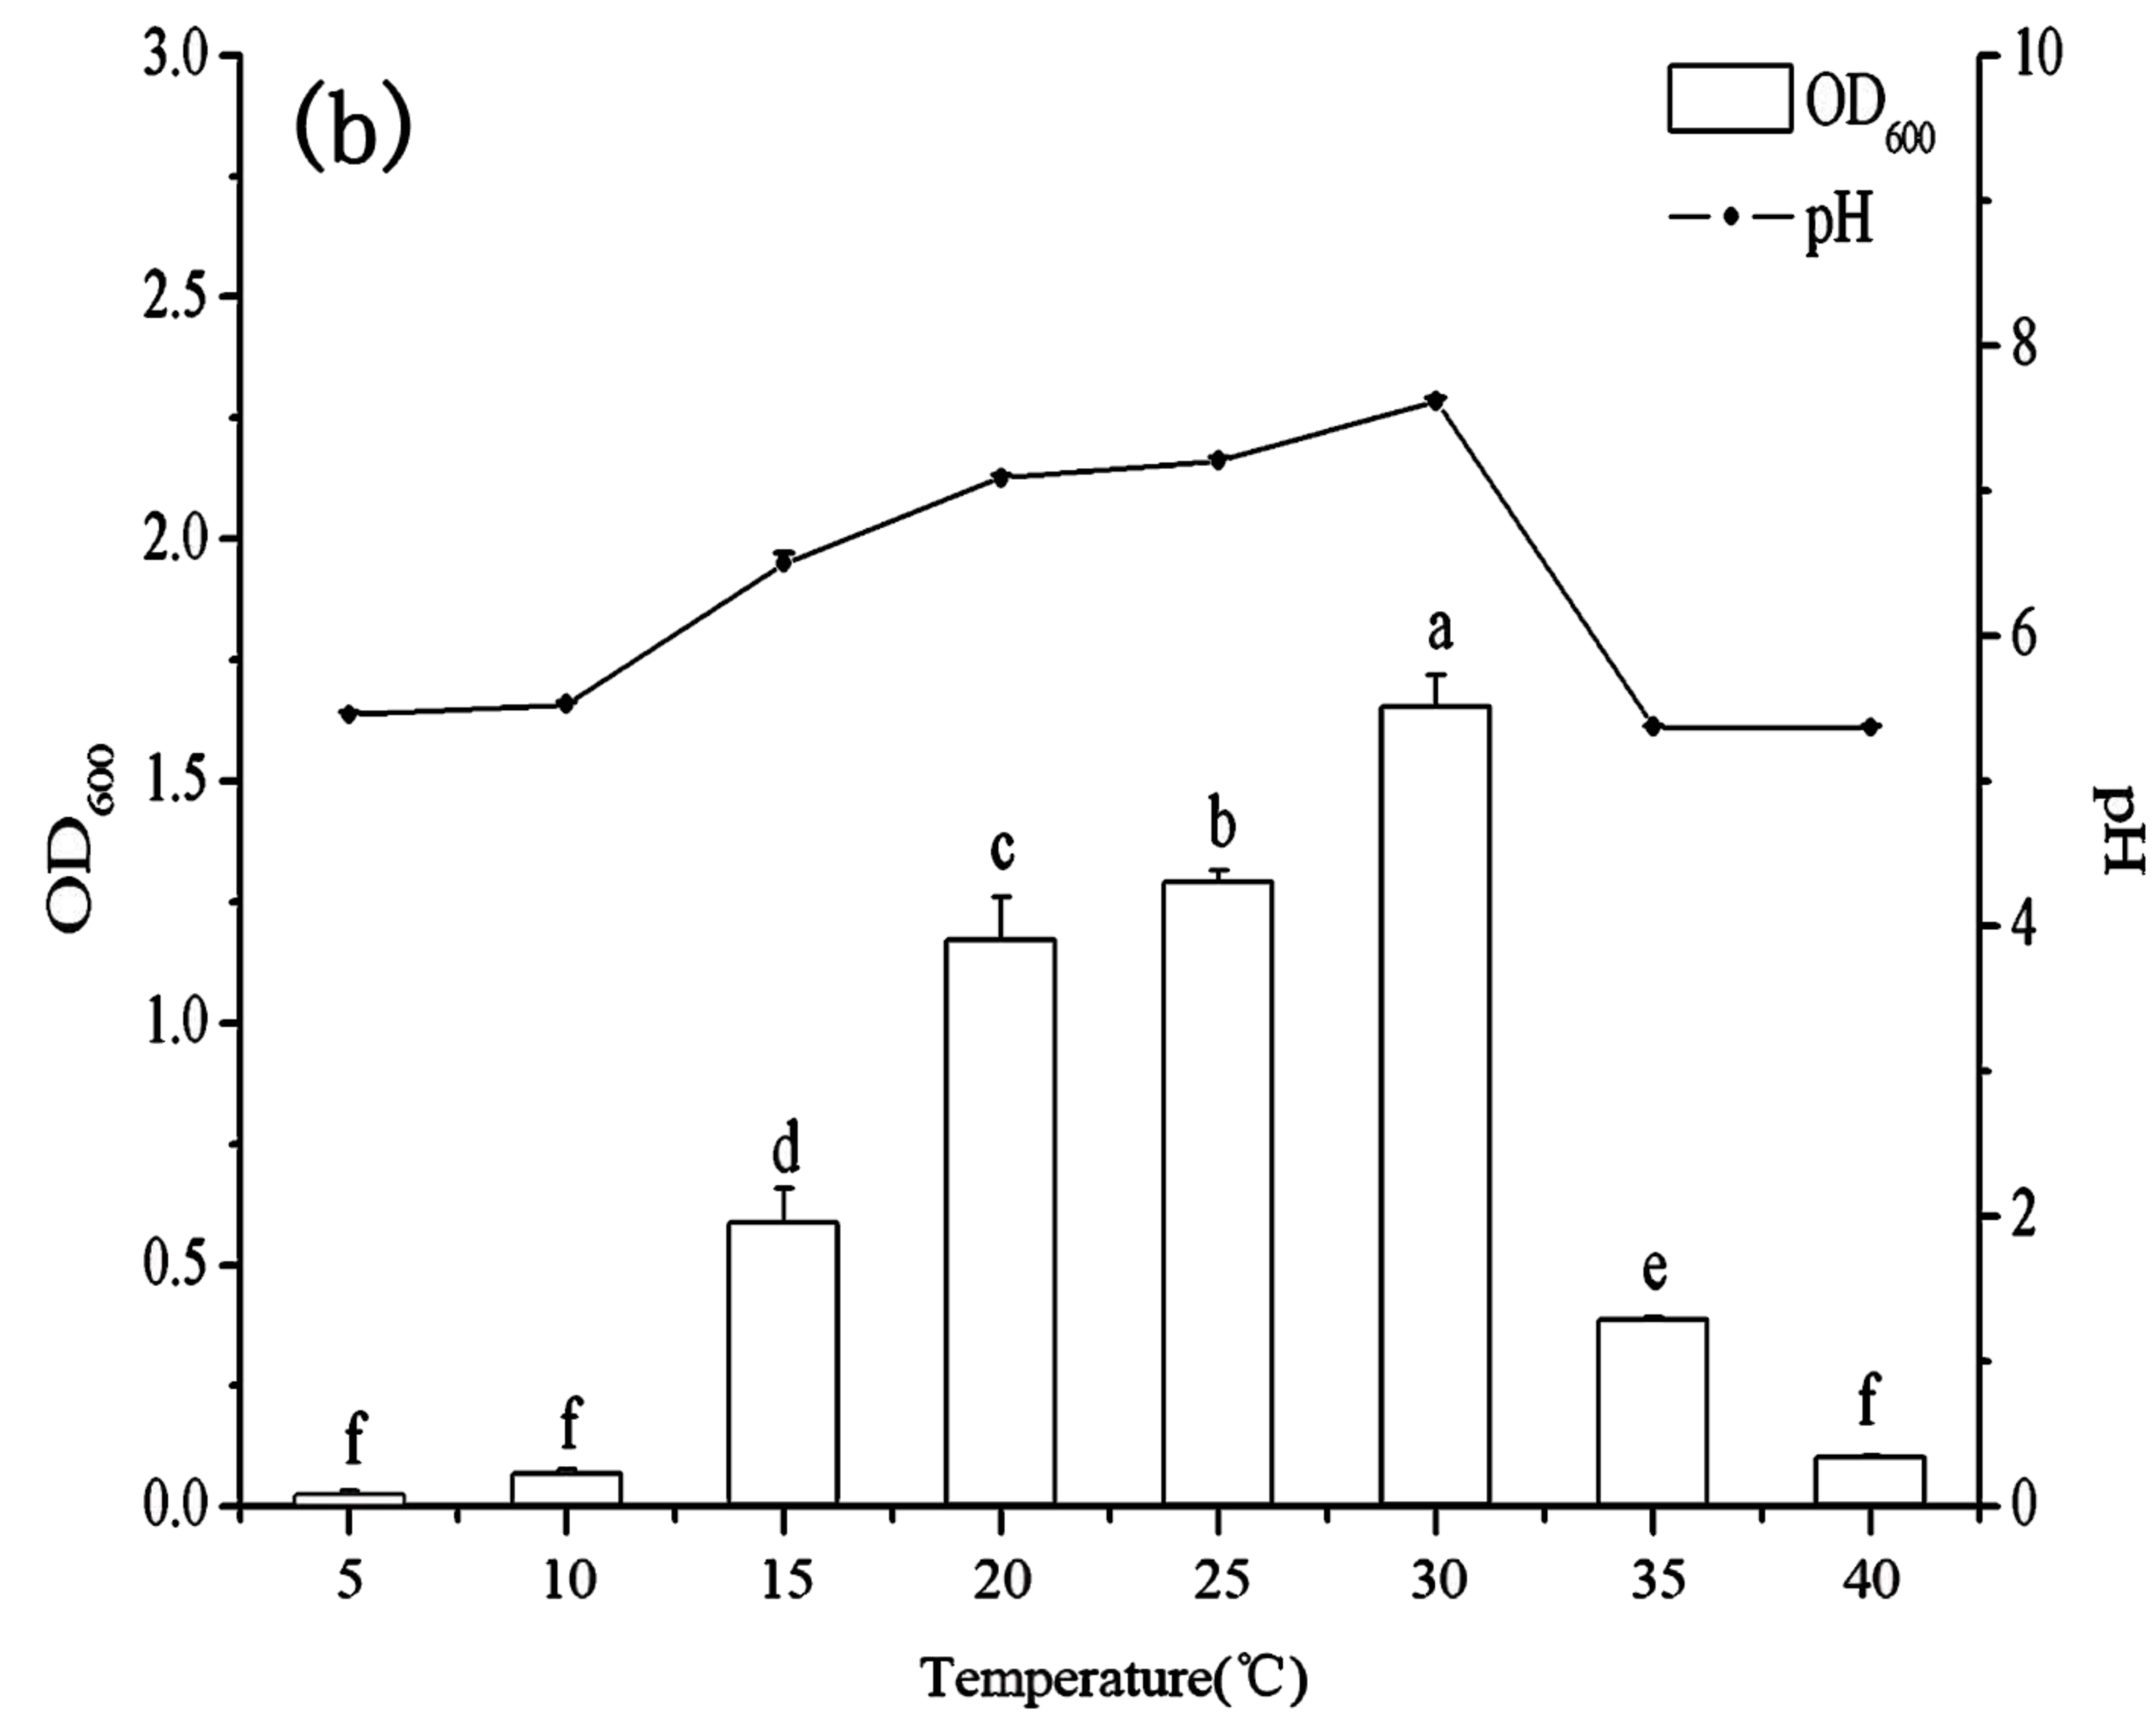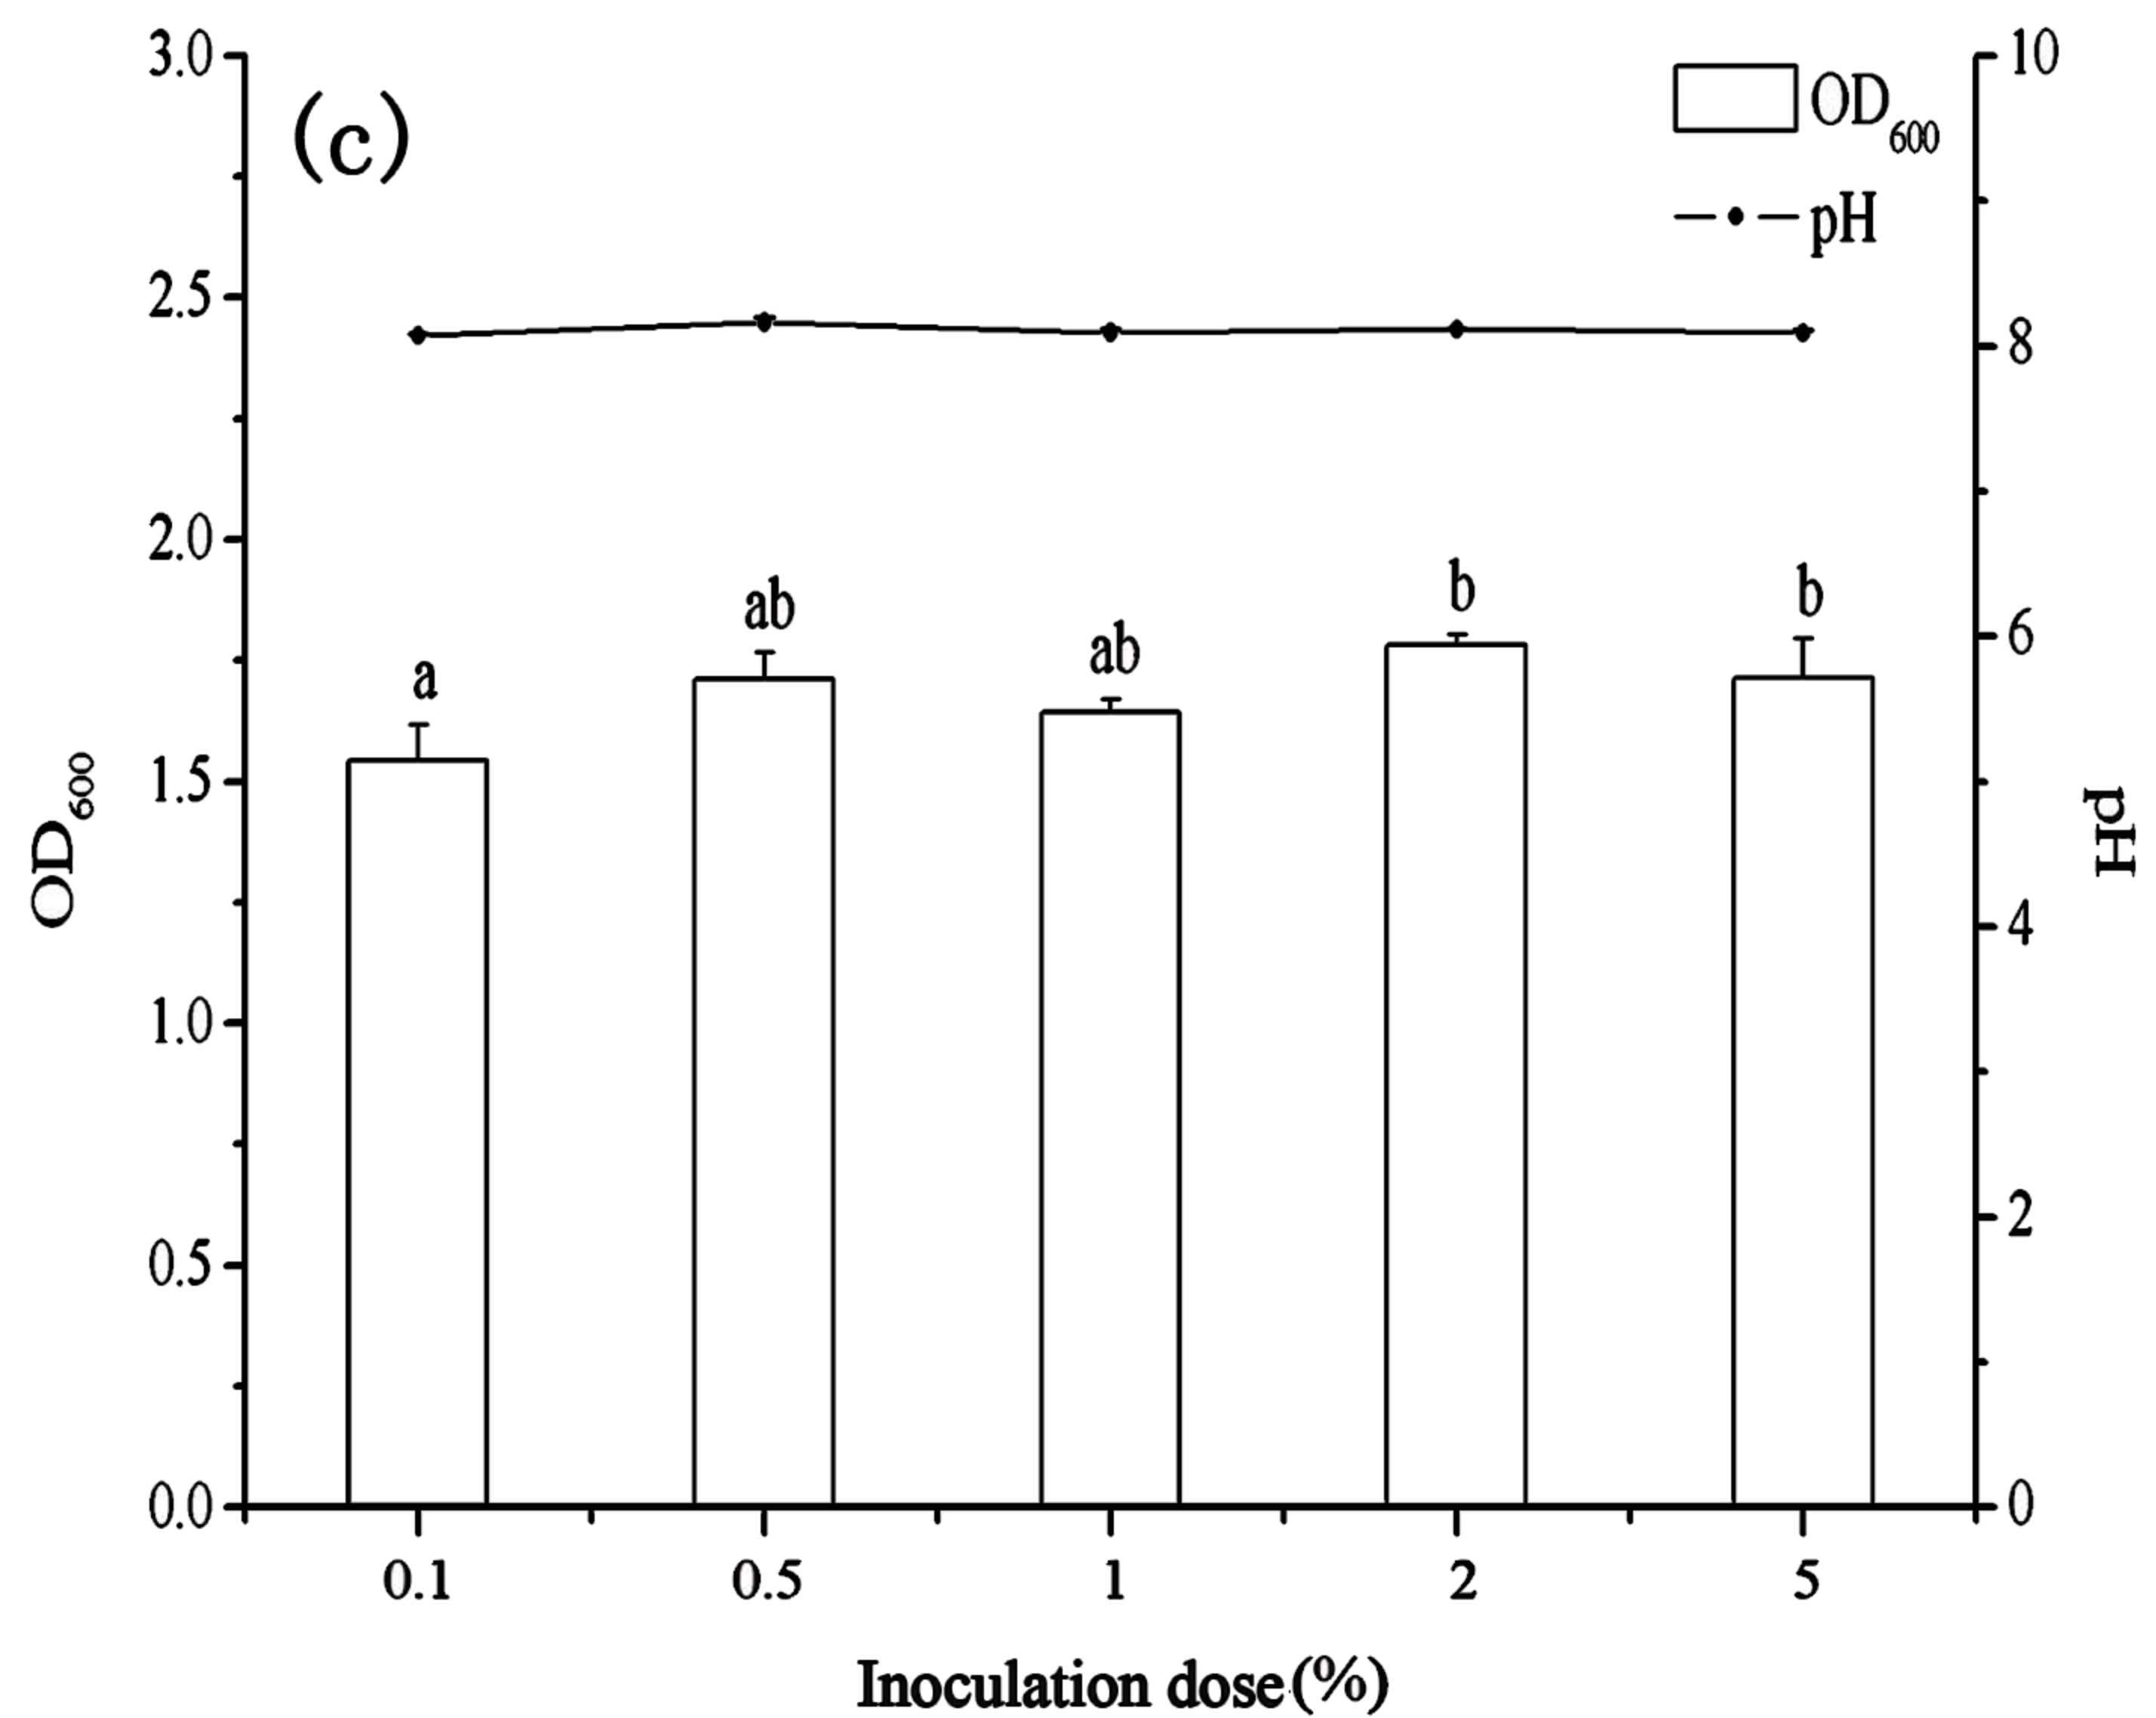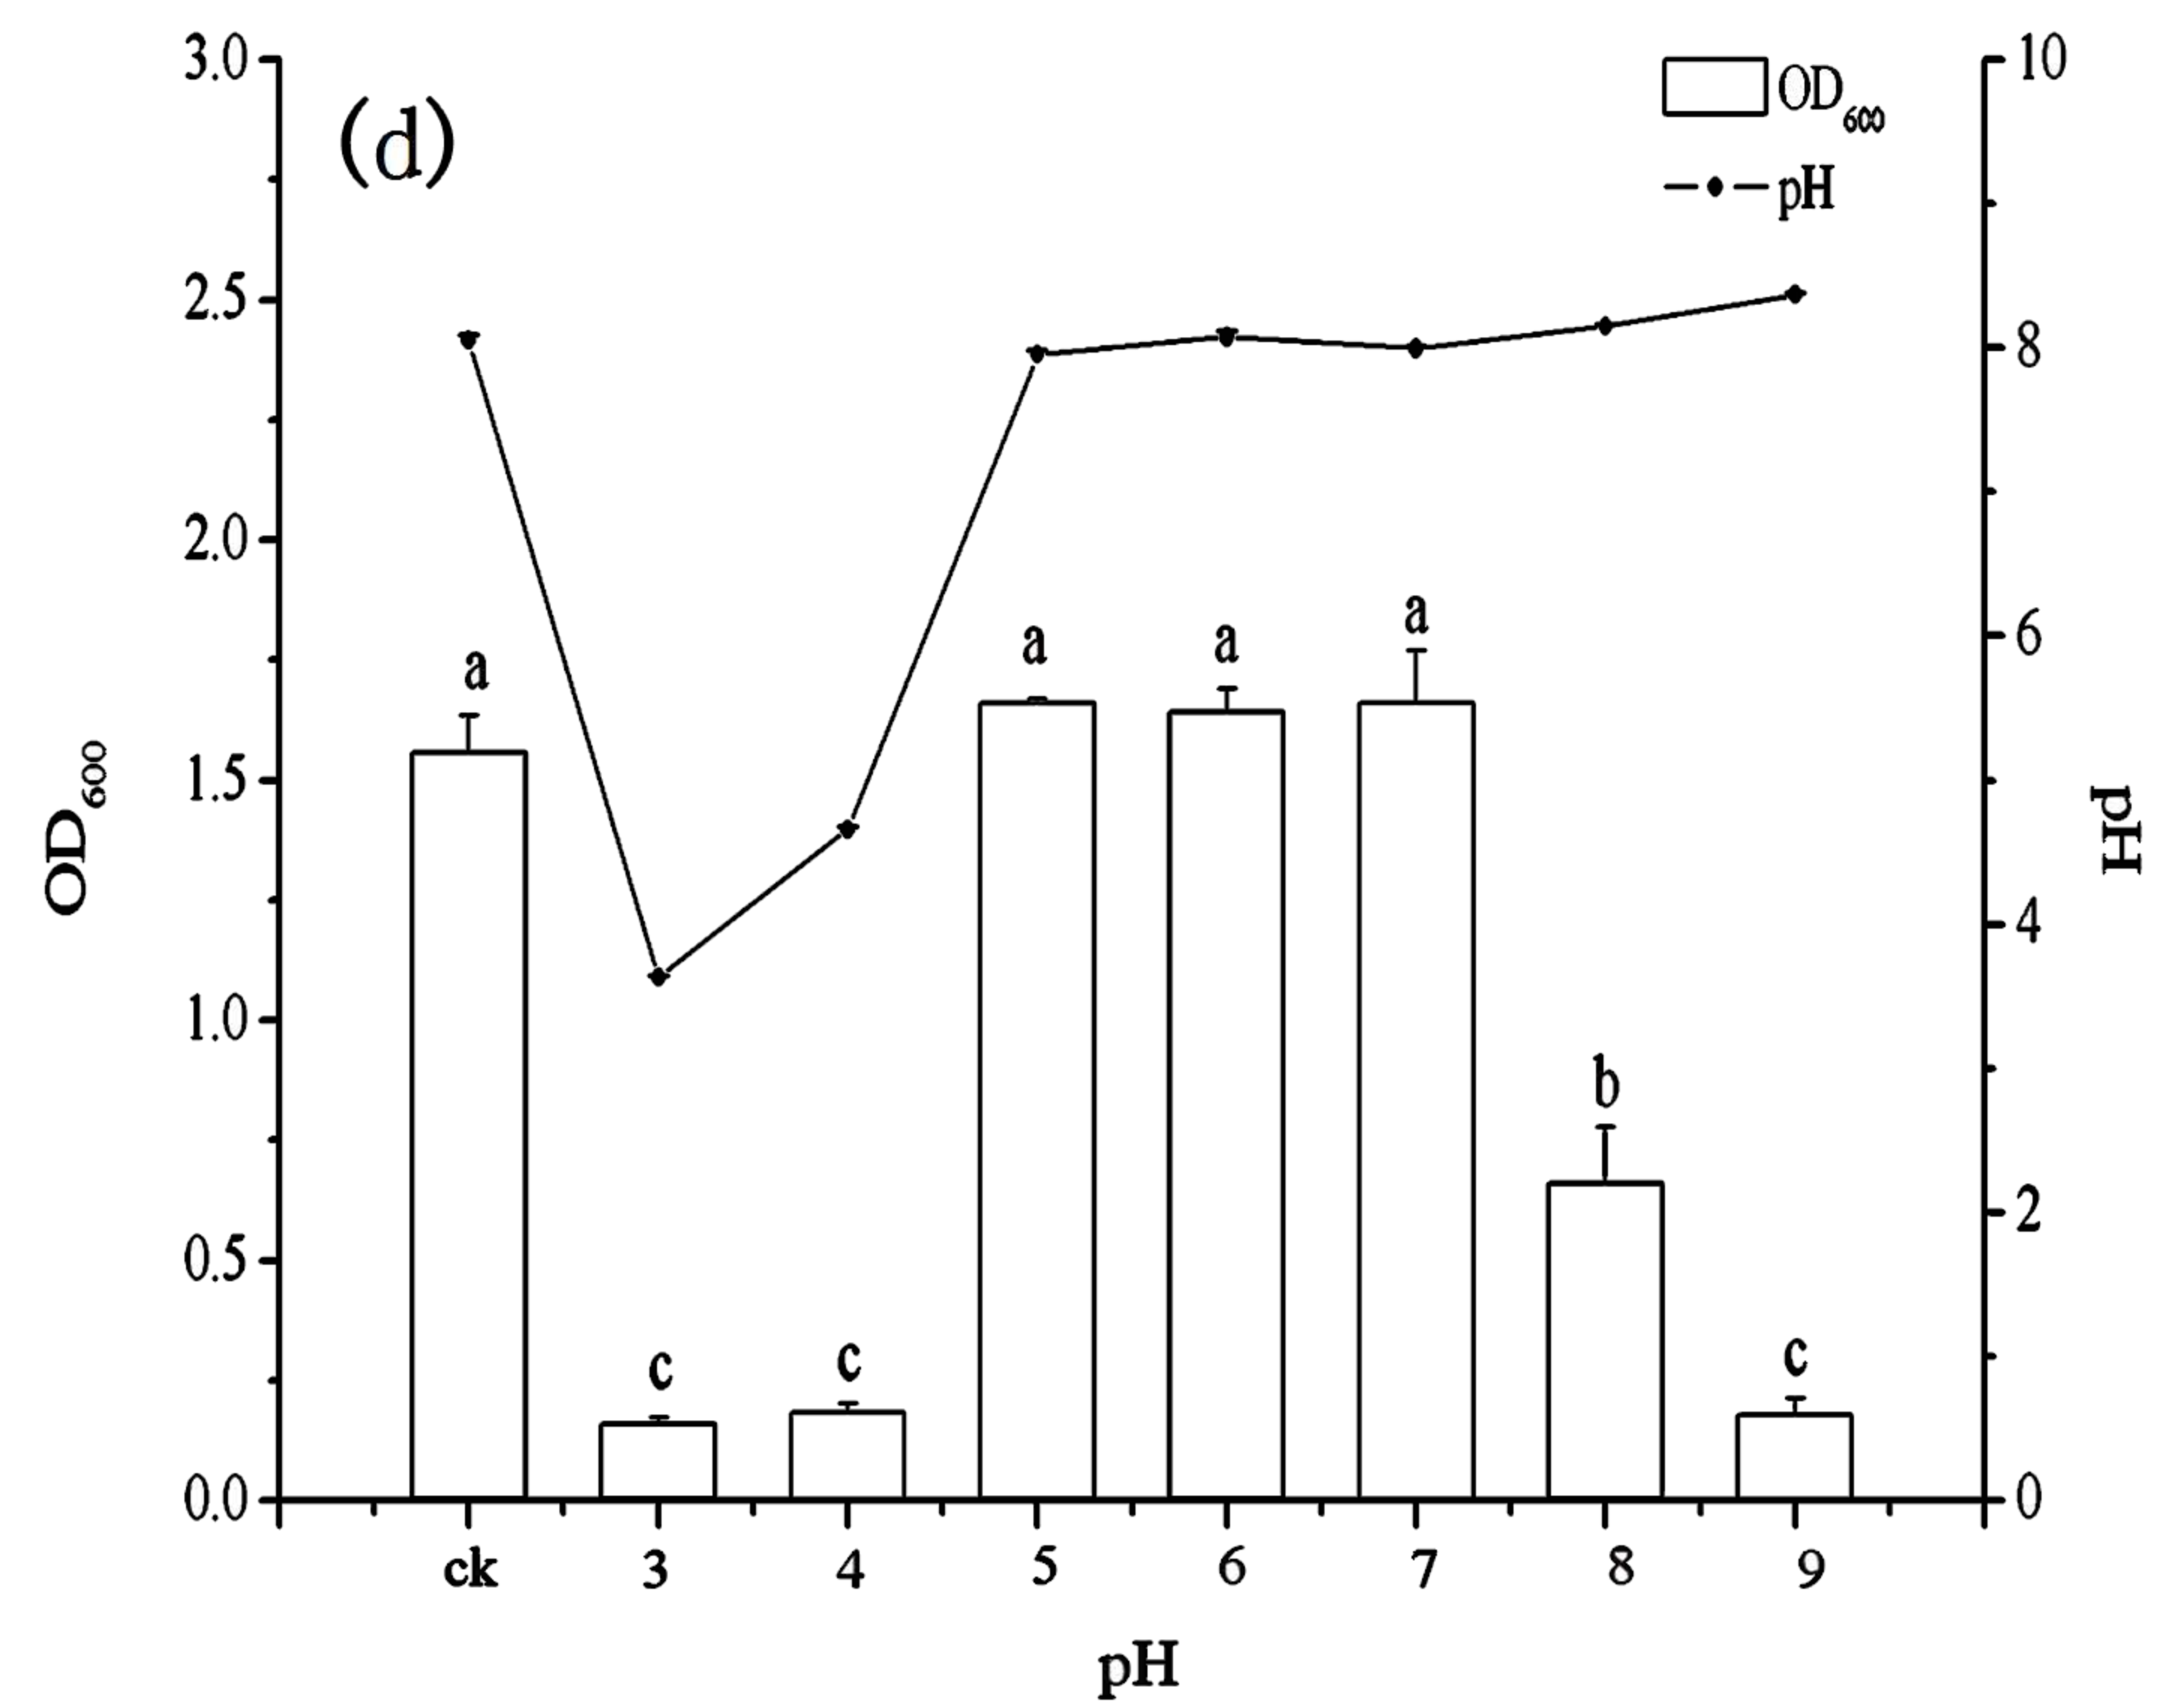

Supplement: FigS1._Single_factor_Experiment.pdf [file FigS1._Single_factor_Experiment.pdf]
